# Supplementary material for: Contrasting patterns from two invasion fronts suggest a niche shift of an invasive predator of native bees
Source: PeerJ journal article supplement (doi:10.7717/peerj.13269), 2022-05-10
Supplement: Supporting_information_PeerJ.pdf [file Supporting_information_PeerJ.pdf]

3  
4 **Contrasting patterns from two invasion fronts suggest a niche shift of an**  
5 **invasive predator of native bees**

6 Maria João Verdasca, Luísa Gigante Carvalheiro, Jesús Aguirre-Gutiérrez, José Pedro  
7 Granadeiro, Quentin Rome, Sébastien J. Puechmaille, Rui Rebelo, Hugo Rebelo

8  
9 Corresponding author: Maria João Verdasca | E-mail : [mjoao.v@gmail.com](mailto:mjoao.v@gmail.com)

10

11 **Sources of Information**

- 12 - ICNF - Instituto da Conservação da Natureza e das Florestas (Portuguese records);  
13 - Bombeiros Voluntários de Viana do Castelo (Portuguese records);  
14 - Ministerio de Agricultura y Pesca, Alimentación y Medio Ambiente (Spanish records provided on a  
15 1 km x 1 km grid - we used the latitude and longitude of the centroid of each presence);  
16 - INPN - Muséum National d'Histoire Naturelle in Paris (native and invasive French records);  
17 - GBIF – Global Biodiversity Information Facility (native and invasive records with a geographical  
18 uncertainty below the resolution of our pixel size - 5km). Available at: [www.gbif.org](http://www.gbif.org)  
19 - Life STOP vespa (italian records): Data available on the online website of the project at:  
20 <https://www.vespavelutina.eu/it-it/> (Accessed: 1 September 2018).  
21 - Data available in *Vespa velutina* in Europe - Google Maps 2017. Available at:  
22 [https://www.google.com/maps/d/u/0/viewer?mid=1jRfoi4oF6GmiGRgbXuD71Qpbw8s&hl=en\\_US&ll=](https://www.google.com/maps/d/u/0/viewer?mid=1jRfoi4oF6GmiGRgbXuD71Qpbw8s&hl=en_US&ll=47.89184612561176%2C10.028028255145273&z=6)  
23 [47.89184612561176%2C10.028028255145273&z=6](https://www.google.com/maps/d/u/0/viewer?mid=1jRfoi4oF6GmiGRgbXuD71Qpbw8s&hl=en_US&ll=47.89184612561176%2C10.028028255145273&z=6) (Accessed: 1 September 2018).

24

25

26 **Methodological details of modelling techniques**

27

28 The GBM models were constructed by fitting 2500 trees and 3 cross-validations to identify the  
29 number of trees that produced most accurate predictions. For RF models 500 trees were used as  
30 the building criterion with a node size of 5. MaxEnt was run with linear, quadratic, product,  
31 threshold and hinge features.

32 To evaluate the importance of variables for determining the suitable environment biomod2 applies  
33 a randomisation procedure randomly shuffling the values of the focus environmental variable and  
34 fitting a model. Then the model predictions of the 'random' and original model are compared, and  
35 their correlation value is obtained. Then the variable importance equals 1 – correlation, so that  
36 unimportant variables have values as low as 0 (not important) and important variables have high  
37 values of up to 1 (highly important). We extracted the resulting variable importance values for all  
38 models created from biomod2.

39

---

## 40 Tables

41 Table S1 – Environmental variables with potential to affect the ecophysiology of *Vespa velutina*.  
 42 The source where each variable was obtained, and its original resolution is indicated in the table.

| Type       | Variables                                                             | Original resolution | Source                |
|------------|-----------------------------------------------------------------------|---------------------|-----------------------|
| Climatic   | BIO1 = Annual Mean Temperature (°C)                                   | 2.5m (~5km)         | worldclim v.2         |
|            | BIO2 = Mean Diurnal Range (Mean of monthly (max temp - min temp) (°C) | 2.5m (~5km)         | worldclim v.2         |
|            | BIO4 = Temperature Seasonality (standard deviation *100) (°C)         | 2.5m (~5km)         | worldclim v.2         |
|            | BIO5 = Max Temperature of Warmest Month (°C)                          | 2.5m (~5km)         | worldclim v.2         |
|            | BIO6 = Min Temperature of Coldest Month (°C)                          | 2.5m (~5km)         | worldclim v.2         |
|            | BIO7 = Temperature Annual Range (BIO5-BIO6) (°C)                      | 2.5m (~5km)         | worldclim v.2         |
|            | BIO10 = Mean Temperature of Warmest Quarter (°C)                      | 2.5m (~5km)         | worldclim v.2         |
|            | BIO11 = Mean Temperature of Coldest Quarter (°C)                      | 2.5m (~5km)         | worldclim v.2         |
|            | BIO12 = Annual Precipitation (mm)                                     | 2.5m (~5km)         | worldclim v.2         |
|            | BIO13 = Precipitation of Wettest Month (mm)                           | 2.5m (~5km)         | worldclim v.2         |
|            | BIO14 = Precipitation of Driest Month (mm)                            | 2.5m (~5km)         | worldclim v.2         |
|            | BIO15 = Precipitation Seasonality (Coefficient of Variation) (mm)     | 2.5m (~5km)         | worldclim v.2         |
|            | BIO16 = Precipitation of Wettest Quarter (mm)                         | 2.5m (~5km)         | worldclim v.2         |
|            | BIO17 = Precipitation of Driest Quarter (mm)                          | 2.5m (~5km)         | worldclim v.2         |
|            | BIO19 = Precipitation of Coldest Quarter (mm)                         | 2.5m (~5km)         | worldclim v.2         |
|            | Topography                                                            | DEM - Altimetry (m) | 30s (1km)             |
| Slope      |                                                                       | 30s (1km)           | Hydrosheds DEM        |
| Northness  |                                                                       | 30s (1km)           | Hydrosheds DEM        |
| Eastness   |                                                                       | 30s (1km)           | Hydrosheds DEM        |
| Land cover | Distance to urban areas (m)                                           | 300m                | ESACCI-LC_LCCS v2.0.7 |
|            | Distance to forest (m)                                                | 300m                | ESACCI-LC_LCCS v2.0.7 |
|            | Distance to water (m)                                                 | 300m                | ESACCI-LC_LCCS v2.0.7 |

43

44 Note: Climatic data were obtained from WORLDCLIM at 2.5-arcmin resolution (Hijmans *et al.*,  
 45 2005), HydroSHEDS topographic data (Lehner, Verdin and Jarvis, 2006) were obtained at 30 s  
 46 resolution and land-cover data were extracted from European Space Agency (2017) at a  
 47 resolution of 300 m.

48

49

## 50 References

51

52 European Space Agency (2017) Land Cover CCI Product User Guide Version 2, CCI-LC-  
 53 PUGV2. Available at: [http://maps.elie.ucl.ac.be/CCI/viewer/download/ESACCI-LC-Ph2-  
 54 PUGv2\\_2.0.pdf](http://maps.elie.ucl.ac.be/CCI/viewer/download/ESACCI-LC-Ph2-PUGv2_2.0.pdf).

55 Hijmans RJ, Cameron S, Parra J, Jones P, Jarvis A (2005) Very high resolution interpolated  
 56 climate surfaces for global land areas. *International Journal of Climatology* 25(15), pp. 1965–  
 57 1978. doi: 10.1002/joc.1276.

58 Lehner B, Verdin K, Jarvis A (2006) HydroSHEDS Technical Documentation. World Wildlife  
 59 Fund US, Washington, DC. Available at: <http://hydrosheds.cr.usgs.gov>.

60  
61  
62

Table S2 - Correlation matrix of the environmental variables that have the potential to affect the ecophysiology of *Vespa velutina* in Europe. Correlated variables ( $r \geq 0.70$ ) are shown in grey.

| Variables | bio1  | bio2  | bio4  | bio5  | bio6  | bio7  | bio10 | bio11 | bio12 | bio13 | bio14 | bio15 | bio16 | bio17 | bio19 | dem   | dfor  | durb  | dwat  | northn | eastn | slope |  |
|-----------|-------|-------|-------|-------|-------|-------|-------|-------|-------|-------|-------|-------|-------|-------|-------|-------|-------|-------|-------|--------|-------|-------|--|
| bio1      | 1.00  |       |       |       |       |       |       |       |       |       |       |       |       |       |       |       |       |       |       |        |       |       |  |
| bio2      | -0.04 | 1.00  |       |       |       |       |       |       |       |       |       |       |       |       |       |       |       |       |       |        |       |       |  |
| bio4      | -0.33 | 0.66  | 1.00  |       |       |       |       |       |       |       |       |       |       |       |       |       |       |       |       |        |       |       |  |
| bio5      | 0.54  | 0.69  | 0.54  | 1.00  |       |       |       |       |       |       |       |       |       |       |       |       |       |       |       |        |       |       |  |
| bio6      | 0.77  | -0.58 | -0.81 | -0.07 | 1.00  |       |       |       |       |       |       |       |       |       |       |       |       |       |       |        |       |       |  |
| bio7      | -0.19 | 0.86  | 0.93  | 0.70  | -0.76 | 1.00  |       |       |       |       |       |       |       |       |       |       |       |       |       |        |       |       |  |
| bio10     | 0.82  | 0.34  | 0.26  | 0.89  | 0.31  | 0.36  | 1.00  |       |       |       |       |       |       |       |       |       |       |       |       |        |       |       |  |
| bio11     | 0.88  | -0.37 | -0.73 | 0.13  | 0.96  | -0.60 | 0.47  | 1.00  |       |       |       |       |       |       |       |       |       |       |       |        |       |       |  |
| bio12     | 0.31  | -0.25 | -0.68 | -0.21 | 0.55  | -0.53 | -0.09 | 0.57  | 1.00  |       |       |       |       |       |       |       |       |       |       |        |       |       |  |
| bio13     | 0.44  | -0.36 | -0.73 | -0.16 | 0.68  | -0.59 | 0.03  | 0.69  | 0.95  | 1.00  |       |       |       |       |       |       |       |       |       |        |       |       |  |
| bio14     | -0.60 | 0.26  | 0.36  | -0.23 | -0.60 | 0.27  | -0.42 | -0.64 | -0.22 | -0.46 | 1.00  |       |       |       |       |       |       |       |       |        |       |       |  |
| bio15     | 0.57  | -0.42 | -0.70 | -0.04 | 0.77  | -0.57 | 0.19  | 0.78  | 0.69  | 0.86  | -0.81 | 1.00  |       |       |       |       |       |       |       |        |       |       |  |
| bio16     | 0.43  | -0.38 | -0.77 | -0.19 | 0.70  | -0.62 | 0.00  | 0.70  | 0.95  | 0.99  | -0.47 | 0.87  | 1.00  |       |       |       |       |       |       |        |       |       |  |
| bio17     | -0.45 | 0.32  | 0.32  | -0.11 | -0.51 | 0.29  | -0.27 | -0.49 | -0.05 | -0.31 | 0.95  | -0.71 | -0.33 | 1.00  |       |       |       |       |       |        |       |       |  |
| bio19     | 0.42  | -0.31 | -0.76 | -0.17 | 0.68  | -0.60 | -0.02 | 0.68  | 0.95  | 0.96  | -0.44 | 0.83  | 0.98  | -0.31 | 1.00  |       |       |       |       |        |       |       |  |
| dem       | -0.44 | 0.04  | 0.10  | -0.16 | -0.34 | 0.14  | -0.35 | -0.32 | 0.20  | 0.15  | 0.01  | 0.07  | 0.13  | 0.07  | 0.08  | 1.00  |       |       |       |        |       |       |  |
| dtrees    | 0.01  | 0.03  | 0.16  | 0.07  | -0.07 | 0.09  | 0.09  | -0.09 | -0.31 | -0.29 | 0.06  | -0.21 | -0.28 | 0.00  | -0.26 | -0.25 | 1.00  |       |       |        |       |       |  |
| durb      | -0.22 | 0.24  | 0.13  | 0.04  | -0.26 | 0.21  | -0.13 | -0.20 | 0.11  | 0.04  | 0.16  | -0.09 | 0.02  | 0.22  | 0.02  | 0.45  | -0.18 | 1.00  |       |        |       |       |  |
| dwat      | -0.11 | 0.07  | 0.11  | 0.04  | -0.13 | 0.12  | -0.04 | -0.12 | 0.02  | 0.00  | 0.02  | 0.00  | 0.00  | 0.06  | -0.01 | 0.23  | -0.08 | 0.21  | 1.00  |        |       |       |  |
| northn    | 0.01  | 0.00  | -0.03 | -0.02 | 0.01  | -0.02 | -0.01 | 0.01  | -0.01 | -0.01 | 0.03  | -0.02 | -0.01 | 0.02  | -0.01 | -0.12 | 0.05  | -0.05 | -0.04 | 1.00   |       |       |  |
| eastn     | -0.02 | -0.01 | 0.05  | 0.02  | -0.03 | 0.03  | 0.02  | -0.03 | -0.05 | -0.04 | -0.01 | -0.02 | -0.05 | -0.01 | -0.06 | 0.09  | -0.03 | 0.03  | 0.01  | 0.02   | 1.00  |       |  |
| slope     | -0.11 | -0.12 | -0.11 | -0.12 | -0.01 | -0.07 | -0.15 | 0.01  | 0.34  | 0.33  | -0.17 | 0.27  | 0.31  | -0.07 | 0.26  | 0.60  | -0.27 | 0.27  | 0.12  | -0.01  | 0.04  | 1.00  |  |

63  
64  
65  
66  
67  
68

69  
70  
71

Table S3 - Correlation matrix of the environmental variables that have the potential to affect the ecophysiology of *Vespa velutina* in Asia. Correlated variables ( $r \geq 0.70$ ) are shown in grey.

| Variable | bio1  | bio2  | bio4  | bio5  | bio6  | bio7  | bio10 | bio11 | bio12 | bio13 | bio14 | bio15 | bio16 | bio17 | bio19 | dem   | dfor  | durb | dwat  | northn | eastn | slope |  |
|----------|-------|-------|-------|-------|-------|-------|-------|-------|-------|-------|-------|-------|-------|-------|-------|-------|-------|------|-------|--------|-------|-------|--|
| bio1     | 1.00  |       |       |       |       |       |       |       |       |       |       |       |       |       |       |       |       |      |       |        |       |       |  |
| bio2     | -0.16 | 1.00  |       |       |       |       |       |       |       |       |       |       |       |       |       |       |       |      |       |        |       |       |  |
| bio4     | -0.44 | -0.05 | 1.00  |       |       |       |       |       |       |       |       |       |       |       |       |       |       |      |       |        |       |       |  |
| bio5     | 0.67  | -0.04 | 0.34  | 1.00  |       |       |       |       |       |       |       |       |       |       |       |       |       |      |       |        |       |       |  |
| bio6     | 0.91  | -0.25 | -0.73 | 0.33  | 1.00  |       |       |       |       |       |       |       |       |       |       |       |       |      |       |        |       |       |  |
| bio7     | -0.42 | 0.22  | 0.95  | 0.38  | -0.75 | 1.00  |       |       |       |       |       |       |       |       |       |       |       |      |       |        |       |       |  |
| bio10    | 0.76  | -0.22 | 0.25  | 0.97  | 0.45  | 0.24  | 1.00  |       |       |       |       |       |       |       |       |       |       |      |       |        |       |       |  |
| bio11    | 0.91  | -0.10 | -0.77 | 0.32  | 0.98  | -0.74 | 0.42  | 1.00  |       |       |       |       |       |       |       |       |       |      |       |        |       |       |  |
| bio12    | 0.20  | -0.43 | -0.64 | -0.38 | 0.49  | -0.75 | -0.25 | 0.44  | 1.00  |       |       |       |       |       |       |       |       |      |       |        |       |       |  |
| bio13    | 0.26  | -0.24 | -0.68 | -0.34 | 0.51  | -0.74 | -0.22 | 0.49  | 0.87  | 1.00  |       |       |       |       |       |       |       |      |       |        |       |       |  |
| bio14    | 0.01  | -0.56 | -0.04 | -0.08 | 0.14  | -0.19 | 0.00  | 0.05  | 0.54  | 0.14  | 1.00  |       |       |       |       |       |       |      |       |        |       |       |  |
| bio15    | 0.29  | 0.28  | -0.47 | -0.09 | 0.34  | -0.39 | -0.05 | 0.41  | 0.08  | 0.50  | -0.66 | 1.00  |       |       |       |       |       |      |       |        |       |       |  |
| bio16    | 0.26  | -0.25 | -0.70 | -0.36 | 0.52  | -0.76 | -0.23 | 0.50  | 0.90  | 0.99  | 0.17  | 0.48  | 1.00  |       |       |       |       |      |       |        |       |       |  |
| bio17    | 0.01  | -0.54 | -0.06 | -0.08 | 0.14  | -0.20 | -0.01 | 0.05  | 0.56  | 0.15  | 0.99  | -0.67 | 0.19  | 1.00  |       |       |       |      |       |        |       |       |  |
| bio19    | -0.13 | -0.42 | 0.07  | -0.11 | -0.02 | -0.06 | -0.08 | -0.11 | 0.45  | 0.06  | 0.89  | -0.72 | 0.10  | 0.91  | 1.00  |       |       |      |       |        |       |       |  |
| dem      | -0.71 | 0.40  | -0.18 | -0.84 | -0.47 | -0.12 | -0.90 | -0.42 | 0.02  | 0.03  | -0.14 | 0.08  | 0.04  | -0.13 | -0.01 | 1.00  |       |      |       |        |       |       |  |
| dtrees   | 0.10  | -0.16 | 0.31  | 0.34  | -0.03 | 0.27  | 0.35  | -0.06 | -0.26 | -0.24 | -0.06 | -0.07 | -0.25 | -0.09 | -0.09 | -0.37 | 1.00  |      |       |        |       |       |  |
| durban   | -0.11 | 0.16  | -0.46 | -0.47 | 0.10  | -0.42 | -0.46 | 0.13  | 0.32  | 0.34  | -0.04 | 0.22  | 0.35  | -0.01 | 0.00  | 0.45  | -0.36 | 1.00 |       |        |       |       |  |
| dwat     | -0.20 | 0.27  | -0.23 | -0.35 | -0.08 | -0.17 | -0.40 | -0.04 | 0.11  | 0.22  | -0.16 | 0.18  | 0.21  | -0.15 | -0.11 | 0.44  | -0.19 | 0.46 | 1.00  |        |       |       |  |
| northn   | 0.09  | 0.22  | -0.07 | 0.07  | 0.07  | -0.01 | 0.04  | 0.09  | 0.01  | 0.09  | -0.09 | 0.13  | 0.07  | -0.07 | -0.06 | -0.09 | -0.02 | 0.06 | 0.03  | 1.00   |       |       |  |
| eastn    | 0.03  | -0.04 | 0.11  | 0.11  | -0.03 | 0.10  | 0.12  | -0.03 | -0.18 | -0.18 | -0.03 | -0.10 | -0.20 | -0.05 | -0.10 | -0.02 | 0.06  | 0.05 | -0.20 | 0.00   | 1.00  |       |  |
| slope    | -0.28 | 0.15  | -0.30 | -0.54 | -0.09 | -0.29 | -0.54 | -0.07 | 0.21  | 0.32  | -0.06 | 0.25  | 0.31  | -0.05 | -0.06 | 0.47  | -0.40 | 0.34 | 0.24  | 0.02   | -0.11 | 1.00  |  |

72

73 Table S4 – Ranges of the selected climatic variables used for modelling of the ecological niche  
 74 of *Vespa velutina* in native and invasive distribution areas. The range of climatic variables used  
 75 for each invasive population P1 (population from France and contiguous records) and P2  
 76 (population from NW of Iberian Peninsula) is also shown.  
 77

| Variables                                        | Non-native Available Climate |      | Native Available Climate |      | Invaded niche |        |        |        | Native niche |      |
|--------------------------------------------------|------------------------------|------|--------------------------|------|---------------|--------|--------|--------|--------------|------|
|                                                  | Min                          | Max  | Min                      | Max  | Min P1        | Max P1 | Min P2 | Max P2 | Min          | Max  |
| Bio1= Annual Mean Temperature (°C)               | -8.7                         | 18.6 | -13.5                    | 28.9 | 3.5           | 15.9   | 10.1   | 16.7   | 4.4          | 25.3 |
| Bio7 = Temperature Annual Range (BIO5-BIO6) (°C) | 12.3                         | 33.5 | 9.1                      | 41.9 | 15.7          | 30.0   | 14.9   | 26.2   | 14.6         | 35.6 |
| Bio10 = Mean Temperature of Warmest Quarter (°C) | -2.5                         | 26.8 | -7.0                     | 32.4 | 10.8          | 22.9   | 15.7   | 24.1   | 13.0         | 29.4 |
| Bio11 = Mean Temperature of Coldest Quarter (°C) | -14.3                        | 13.3 | -22.7                    | 27.5 | -2.8          | 9.6    | 3.6    | 10.7   | -8.8         | 21.7 |
| Bio17 = Precipitation of Driest Quarter (mm)     | 10                           | 562  | 0                        | 773  | 6.5           | 294    | 46     | 161    | 16           | 493  |
| Bio19 = Precipitation of Coldest Quarter (mm)    | 63                           | 713  | 0                        | 3228 | 104           | 425    | 246    | 644    | 21           | 495  |

78

79

80

81

82

83

84

85

86

87

88

89

90

91

92

93

94 **Figures**

95

96

97

98

99

100

101

102

103

104

105

106

107

108

109

110

111

112

113

114

115

116

117

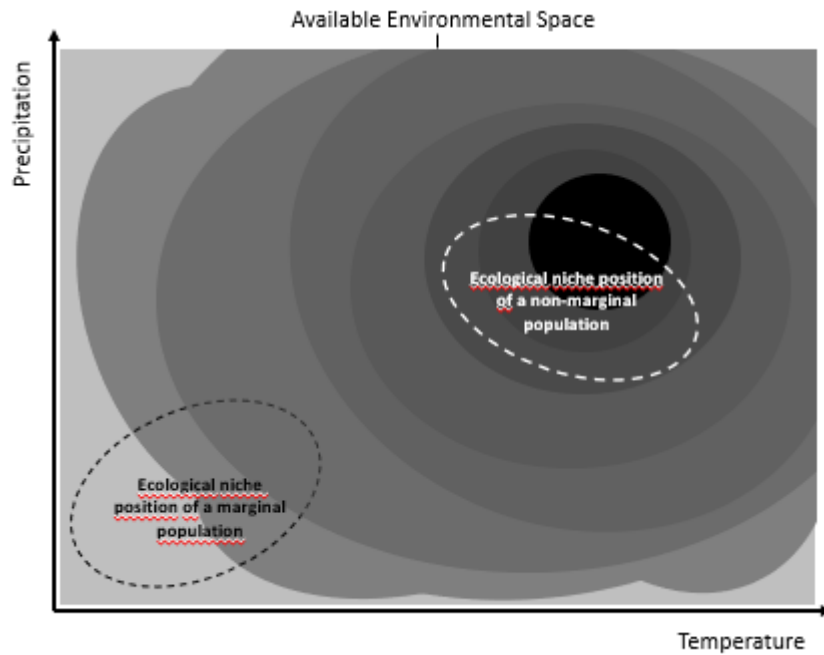

111 Fig. S1 - Schematic representation of the species' marginality concept. The large square represents the total available environmental space. The growing intensity of the colour is proportional to the frequency of the combined environmental conditions in a geographical area, from the less frequent or marginal environmental conditions (light grey) to the most common conditions (black). The dashed lines, black and white, represents the ecological niche position of a marginal and non-marginal population, respectively.

118

119

120

121

122

123

124

125

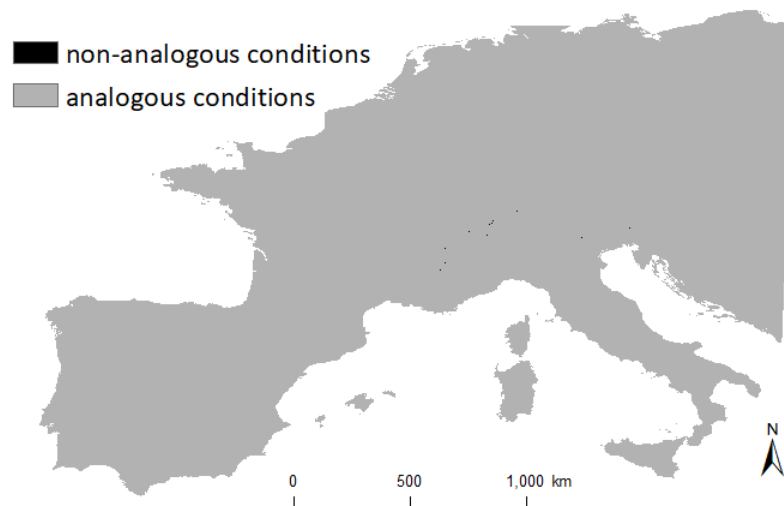

126 Fig. S2 - Comparison of the environmental similarity of variables to the environmental data used for training the model. Multivariate Environmental Similarity Surfaces (MESS) shows areas in grey, representing the regions with environmental similarity to the native range and areas in black (very small: 0.008% of the Europe area) having one or more environmental variables outside the range present in the training data, so predictions in those areas should be treated with strong caution.

132  
133  
134  
135  
136  
137  
138  
139  
140  
141  
142  
143  
144  
145  
146  
147  
148  
149  
150  
151  
152  
153  
154  
155  
156  
157  
158  
159  
160  
161  
162  
163  
164  
165  
166  
167

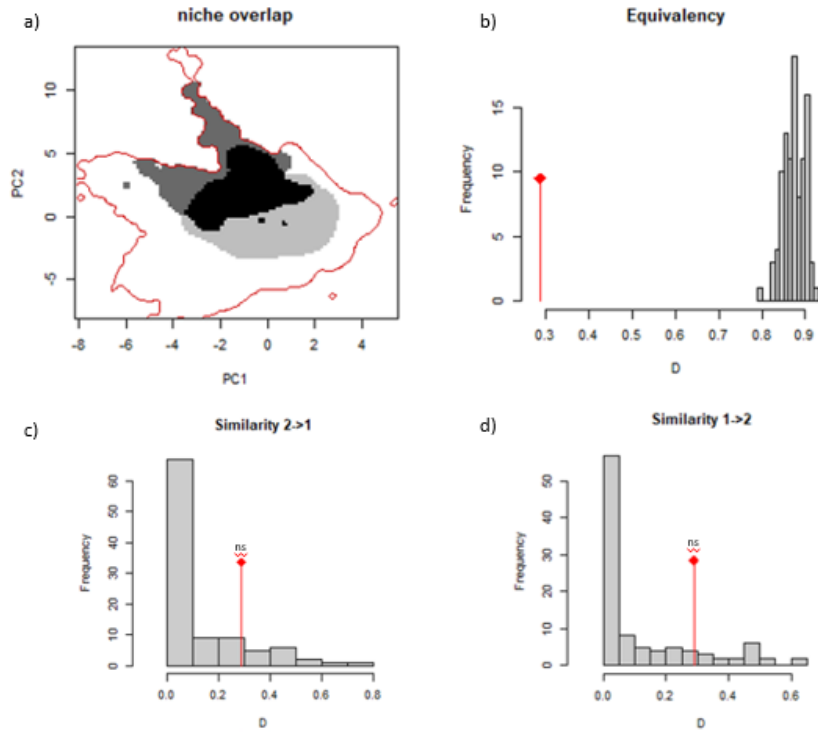

Figure S3 – Similarity and equivalence test between native and invasive distribution of P1. Visual representation of niche overlap between native and invasive ranges where the solid contour line illustrates the kernel density estimates corresponding to 100% of the available (background) environment (a); Histograms (b-c-d) show the observed niche overlap D between the two ranges (bars with a diamond) and simulated niche overlaps (grey bars) on which tests of niche equivalency (b), niche similarity of Europe-P1 to Asia (c), and niche similarity of Asia to Europe-P1 (d) are calculated from 100 iterations. The significance of the tests is shown (ns, non-significant).

168  
169  
170  
171  
172  
173  
174  
175  
176  
177  
178  
179  
180  
181  
182  
183  
184  
185  
186  
187  
188  
189  
190  
191  
192  
193  
194  
195  
196  
197  
198  
199  
200

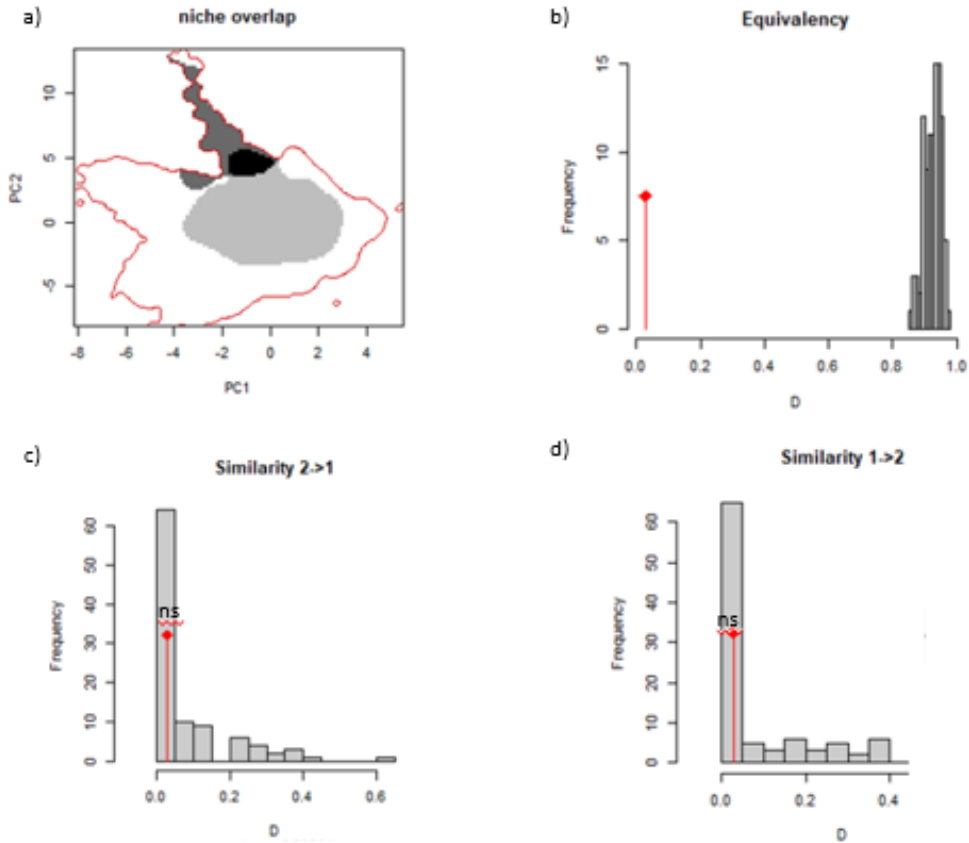

Figure S4 – Similarity and equivalence test between native and invasive distribution of P2. Visual representation of niche overlap between native and invasive ranges where the solid contour line illustrates the kernel density estimates corresponding to 100% of the available (background) environment (a); Histograms (b-c-d) show the observed niche overlap D between the two ranges (bars with a diamond) and simulated niche overlaps (grey bars) on which tests of niche equivalency (b), niche similarity of Europe-P2 to Asia (c), and niche similarity of Asia to Europe-P2 (d) are calculated from 100 iterations. The significance of the tests is shown (ns, non-significant).



201  
202  
203  
204  
205  
206  
207  
208  
209  
210  
211  
212  
213

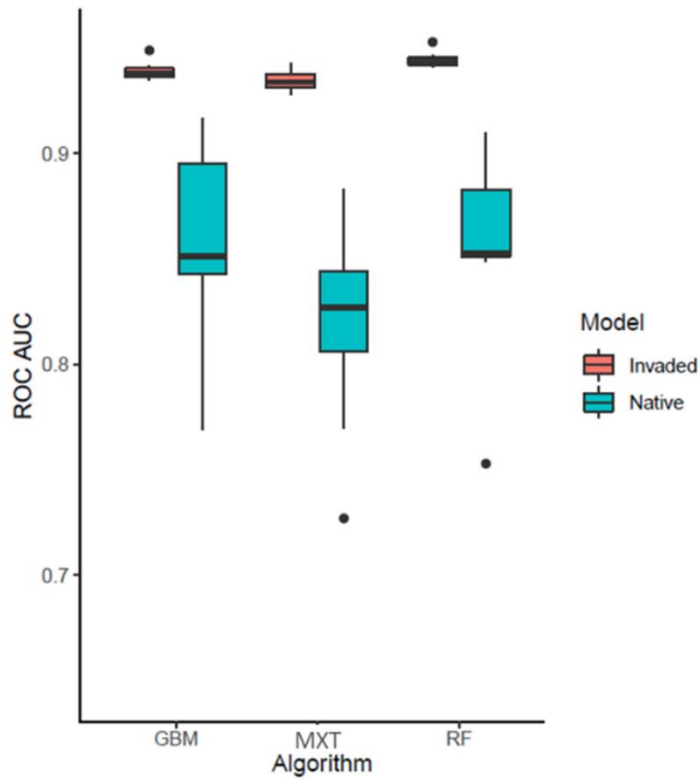

214 Fig. S5 – Variation of the Area Under the Curve (AUC) across the different modelling techniques.  
215

216 a)

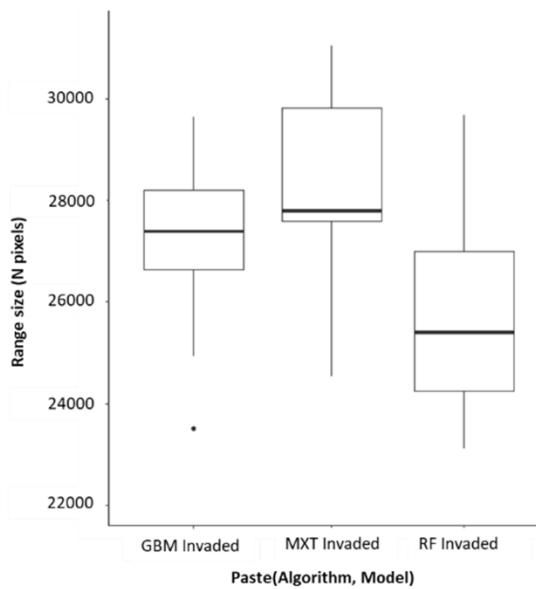

b)

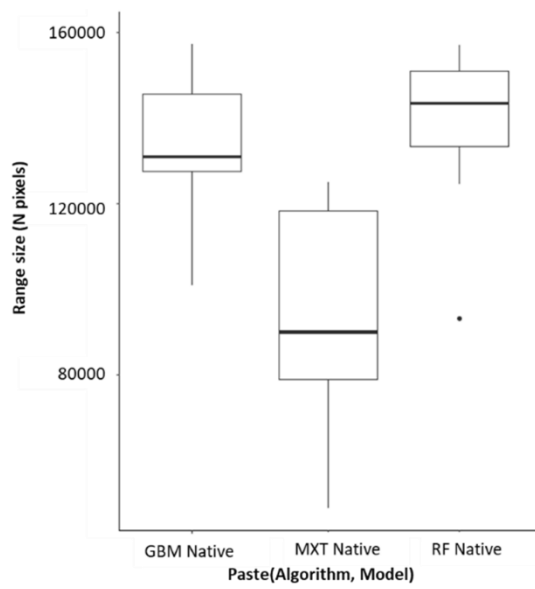

220

221 Fig. S6 – Variation of the predicted European range size with the different modelling techniques  
222 using the invasive (a) and native (b) models.

223

224

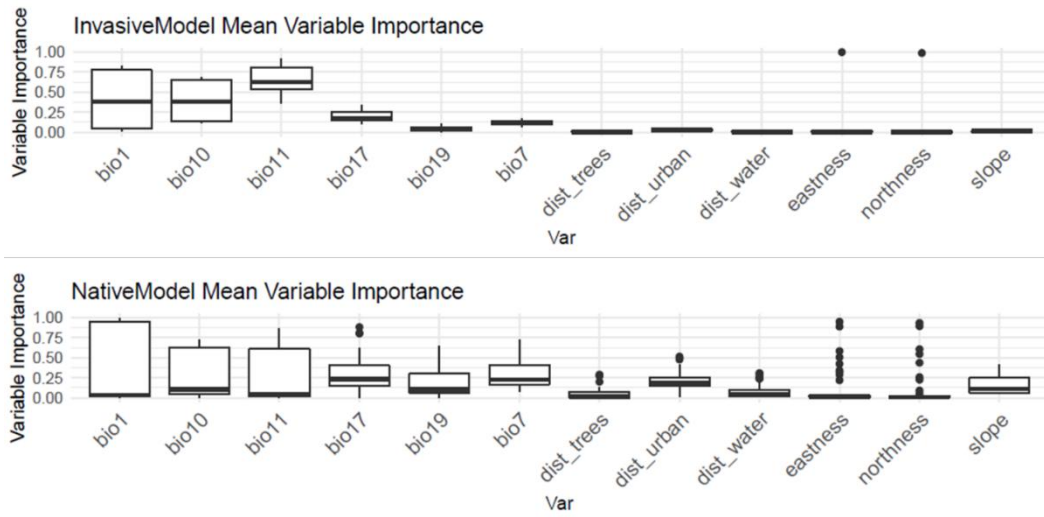

225 Fig. S7 – Variation of variable importance according to invasive and native models.

226

227

228

229
